# Supplementary material
Source: publisher figshare collection journal article supplement (https://sage.figshare.com/ndownloader/files/15778748)
Supplement: Supplementary file 1 [file 15778748]

**Supplementary table 2.** List of biomarkers analyzed in BioRad multiarray and abbreviations

**Abbreviation Full name**

5'-NT 5'-nucleotidase

ABL1 Abelson murine leukemia viral oncogene homolog 1

ADAM 8 A Disintegrin and metalloproteinase domain-containing protein 8

ADAM-TS 15 A disintegrin and metalloproteinase with thrombospondin motif 15

ANXA1 Annexin A1

AREG Amphiregulin

CAIX Carbonic anhydrase IX

CD160 Cluster of Differentiation 160

CD207 Cluster of Differentiation 207

CD27 Cluster of Differentiation 27

CD48 Cluster of Differentiation 48

CD70 Cluster of Differentiation 70

CEACAM1 Carcinoembryonic antigen-related cell adhesion molecule 1

CEACAM5 Carcinoembryonic antigen-related cell adhesion molecule 5

CPE Core promoter element

CRNN Cornulin

CTSV Cathepsin V

CXCL13 C-X-C motif chemocine ligand 13

CXL17 C-X-C motif chemokine ligand 17

CYR61 Cysteine-rich angiogenic inducer 61

DKN1A cyclin dependent kinase inhibitor 1A

DLL1 Delta-like protein 1

EGF Epidermal growth factor

EPHA2 Ephrin type-A receptor 2

ERBB2 Receptor tyrosine-protein kinase erbB-2

ERBB3 Receptor tyrosine-protein kinase erbB-3

ERBB4 Receptor tyrosine-protein kinase erbB-4

ESM-1 Endothelial Cell Specific Molecule 1

FADD Fas-associated protein with death domain

FASLG Fas Ligand

FCRLB Fc receptor like B

FGF-BP1 Fibroblast growth factor-binding protein 1

FR-alpha Folate receptor alpha

FR-gamma Folate receptor gamma

FURIN Furin

Gal-1 Galectin-1

GPC1 Glypican 1

GPNMB Transmembrane glycoprotein NMB

GZMB Granzyme B

GZMH Granzyme H

HGF Hepatocyte growth factor

hK11 Kallikrein 11

hK14 Kallikrein 14

hK8 Kallikrein 8

ICOSLG Inducible T Cell Costimulator Ligand

IFN-gamma-R1 Interferon gamma receptor 1

IGF1R Insulin Like Growth Factor 1 Receptor

**Supplementary table 2.** List of biomarkers analyzed in BioRad multiarray and abbreviations

IL6 Interleukine 6

ITGAV Integrin Subunit Alpha V

ITGB5 Integrin Subunit Beta 5

KLK13 Kallikrein 13

LY9 T-lymphocyte surface antigen Ly-9

LYN Tyrosine-protein kinase Lyn

LYPD3 Ly6/PLAUR domain-containing protein 3

MAD homolog 5 Mothers against decapentaplegic homolog 5

MetAP 2 Methionine aminopeptidase 2

MIA Melanoma inhibitory activity protein

MIC-A/B MHC class I polypeptide-related sequence A/B

MK neurite growth-promoting factor 2

MSLN Mesothelin

MUC-16 Mucin-16

PODXL Podocalyxin like protein

PPY pancreatic polypeptide

PVRL4 Nectin-4

RET Proto-oncogene tyrosine-protein kinase receptor Ret

RSPO3 R-Spondin 3

S100A11 S100 calcium-binding protein A11

S100A4 S100 calcium-binding protein A4

SCAMP3 Secretory carrier-associated membrane protein 3

SCF F-box containing complex

SEZ6L Seizure 6-like protein

SPARC Basement-Membrane Protein 40

SYND1 Syndecan 1

TCL1A T-cell leukemia/lymphoma protein 1A

TFPI-2 Tissue Factor Pathway Inhibitor 2

TGF-alpha Transforming Growth Factor Alpha

TGFR-2 Transforming Growth Factor Receptor 2

TLR3 Toll Like Receptor 3

TNFRSF19 TNF Receptor Superfamily Member 19

TNFRSF4 TNF Receptor Superfamily Member 4

TNFRSF6B TNF Receptor Superfamily Member 6b

TNFSF13 TNF Superfamily Member 13

TRAIL TNF Superfamily Member 10

TXLNA Taxilin Alpha

VEGFA Vascular Endothelial Growth Factor A

VEGFR-2 Vascular endothelial growth factor receptor 2

VEGFR-3 Vascular endothelial growth factor receptor 3

VIM Vimentin

WFDC2 WAP Four-Disulfide Core Domain Protein 2

WIF-1 WNT Inhibitory Factor 1

WISP-1 WNT1-inducible-signaling pathway protein 1

XPNPEP2 X-Prolyl Aminopeptidase 2
